# Supplementary material for: In silico strategy to boost stability, axiality, and barrier heights in dysprocenium SIMs via SWCNT encapsulation
Source: Royal Society of Chemistry journal article supplement (doi:10.1039/d1cc03434k), 2021-01-01
Supplement: d1cc03434k1.pdf [file d1cc03434k1.pdf]

## Supporting Information

### **In Silico Strategy to Boost Stability, Axiality, and Barrier Heights in Dysprocenium SIMs via SWCNT Encapsulation**

Rizwan Nabi, Rupesh Kumar Tiwari and Gopalan Rajaraman\*†

† *Department of Chemistry, Indian Institute of Technology Bombay, Powai, Mumbai-400076, India. Tel: (+91)-22-2576-7183. Email: [rajaraman@chem.iitb.ac.in](mailto:rajaraman@chem.iitb.ac.in)*

## Table of Contents

| Contents                     | Page No. |
|------------------------------|----------|
| <b>Computational details</b> | S3       |
| <b>TableS1</b>               | S3       |
| <b>Figure S1</b>             | S4       |
| <b>Table S2</b>              | S4       |
| <b>Table S3</b>              | S5-6     |
| <b>Figure S2</b>             | S6       |
| <b>Binding energy</b>        | S7       |
| <b>Table S4</b>              | S7       |
| <b>Table S5</b>              | S7       |
| <b>Figure S3</b>             | S9       |
| <b>Table S6</b>              | S9       |
| <b>Figure S4</b>             | S10      |
| <b>Table S7</b>              | S10-11   |
| <b>Figure S5</b>             | S11      |
| <b>Table S8</b>              | S12      |
| <b>Figure S6</b>             | S12      |
| <b>Table S9</b>              | S13      |
| <b>LoProp charges</b>        | S13      |
| <b>Table S10</b>             | S13-14   |
| <b>Table S11</b>             | S14-17   |
| <b>Figure S7</b>             | S17      |
| <b>Table S12</b>             | S18-20   |
| <b>Figure S8</b>             | S21      |
| <b>Figure S9</b>             | S21      |
| <b>Figure S10</b>            | S22      |
| <b>Figure S11</b>            | S22      |
| <b>Figure S12</b>            | S23      |
| <b>Figure S13-S14</b>        | S23-24   |
| <b>Figure S15-S21</b>        | S27-30   |
| <b>TableS14-S15</b>          | S26-27   |
| <b>References</b>            | S31      |

### Computational details:

All the DFT calculations have been performed in the CP2k program package.<sup>1,2</sup> The CP2k package utilises a hybrid basis set formalism known as Gaussian and Plane Wave Method<sup>3</sup> (GPW) where the Kohn–Sham orbitals are expanded in terms of contracted Gaussian type orbitals (GTOs), while an auxiliary plane-wave basis set is used to expand the electronic charge density. A double- $\zeta$  GTH basis set and their relativistic norm-conserving pseudopotentials (Goedecker, Teter, and Hutter)<sup>4</sup> optimised for PBE were used in addition to a plane wave basis set with an energy cut-off of 450 Ry.<sup>5</sup> All calculations were carried out with DZVP-MOLOPT-GTH (valence double-zeta ( $\zeta$ ) plus polarisation, molecularly optimised, Goedecker-Teter-Hutter) basis set for all atoms (H, C,) and DZVP-MOLOPT-SR-GTH (valence double-zeta ( $\zeta$ ) plus polarisation, molecularly optimised, short-range Goedecker-Teter-Hutter) basis set for Y as implemented in the CP2k.<sup>3</sup> The pseudopotential used was GTH-pseudopotential (Goedecker-Teter-Hutter). PBE functional has been used throughout the calculations performed with the CP2k package. To account for dispersion, the DFT-D2 approach implemented in CP2k has been used throughout the calculations. All the *ab initio* calculations have been performed by the post-Hartree–Fock *ab initio* calculations by using the MOLCAS 8.0 code.<sup>6</sup> Basis sets for all atoms were taken from the ANO-RCC library as implemented in the MOLCAS package.

| Table S1. List<br>ANO-RCC basis | <i>Element</i> | <i>Basis Sets</i> |              | of the used<br>sets. |
|---------------------------------|----------------|-------------------|--------------|----------------------|
|                                 |                |                   |              |                      |
|                                 | Dy             | 8s7p5d3f2g1h.     | ANO-RCC-VTZP |                      |
|                                 | C              | 3s2p1d.           | ANO-RCC-VDZP |                      |
|                                 | C (SWCNT)      | 3s2p1d.           | ANO-RCC-VDZ  |                      |
|                                 | H              | 2s1p.             | ANO-RCC-VDZ  |                      |

All the calculations were carried out using complete active space (CAS). In the case of Dy, the active space comprised of nine active electrons of Dy<sup>III</sup> in the seven 4f active orbitals RAS (9,7). The ground-state *f*-electron configuration for Dy<sup>III</sup> is found to be 4f<sup>9</sup>, which yields <sup>6</sup>H<sub>15/2</sub> multiplet as the ground state. The CASSCF calculations were performed with the same basis sets and active spaces to obtain relative energies of the Kramers doublets (KDs), *g* tensors. For Dy<sup>III</sup>, we used 21

roots in the sextet state and 128 roots in the quartet state in the configuration interaction (CI) procedure. Once these spin-free excited states are obtained, we mixed all of these states by using the RASSI-SO module to compute the spin-orbit coupled states. We obtained eight low-lying KDs for Dy<sup>III</sup> ion which finally yielded *g*-tensors. All the frequency calculations were carried out in Gaussian 09 program package. For all the elements, TZV basis sets and B3LYP functional<sup>7</sup> were used for all the calculations implemented in Gaussian 09.<sup>8</sup>

Here, we are using metallic armchair SWCNTs to investigate their effect on the magnetic properties of dysprosium SIMs. We are using two types of SWCNTs. For model complex **1**, we are using CNT(7,7) in both the arrangements parallel (1<sup>||</sup>@CNT) as well as perpendicular (1<sup>⊥</sup>@CNT) having diameter and length of ~8.5 and ~11.0 Å respectively. For complexes **2** and **3**, we are using CNT(10,10) having diameter and length of ~6.8 and ~12.3 Å respectively. For model complex Dy@ stonewall defected SWCNT) we are using CNT(3,3) having diameter and length 5.35 Å and 10 Å respectively. The CNT(10,10) SWCNT was experimentally synthesized and has been studied widely for use in Li-ion batteries.<sup>9-11</sup> There are also many reports on SWCNTs like CNT(7,7) and CNT(3,3).<sup>12, 13</sup>

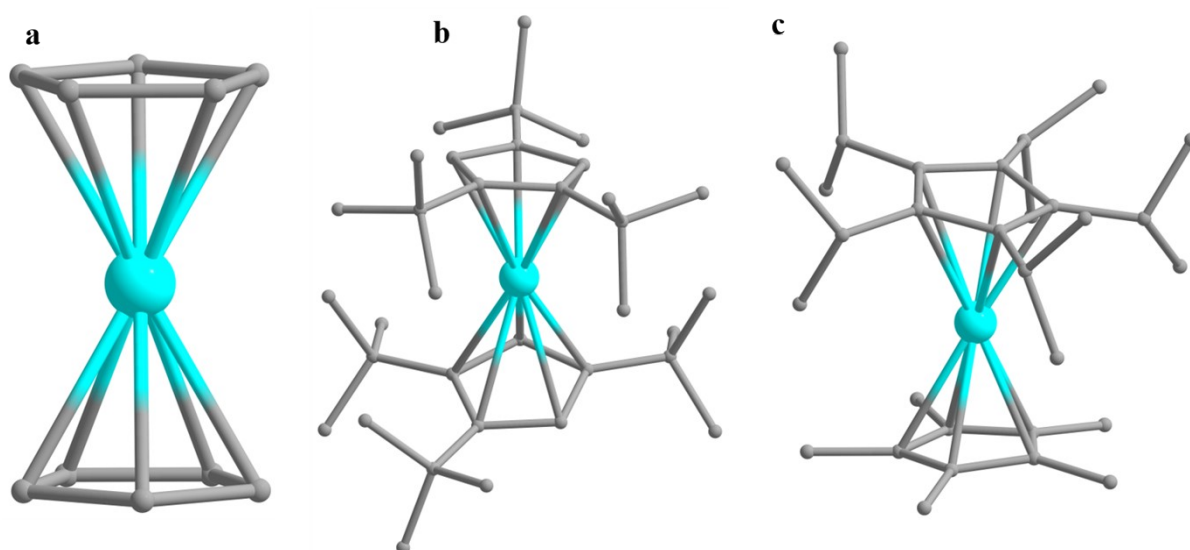

**Figure S1:** Optimised molecular structure of various dysprosium complexes. a.) model [DyCp<sub>2</sub>]<sup>+</sup> (**1**) b.) [Dy(Cp<sup>ttr</sup>)<sub>2</sub>]<sup>+</sup> (**2**) c.) [(Cp<sup>ipr5</sup>)Dy(Cp<sup>\*</sup>)] (**3**); Where, (Cp<sup>ttr</sup>=1,2,4-tri(*tert*butyl) cyclopentadienide), (Cp<sup>ipr5</sup> = penta-*iso*-propylcyclopentadienyl, Cp<sup>\*</sup> = pentamethylcyclopentadienyl).

**Table S2.** Dy-C bond lengths and Cp-Dy-Cp angle of **2**<sub>opt</sub>, **2**<sub>x-ray</sub>, **3**<sub>opt</sub>, **3**<sub>x-ray</sub>

|       | <b>2</b> <sub>opt</sub> | <b>2</b> <sub>x-ray</sub> | <b>3</b> <sub>opt</sub> | <b>3</b> <sub>x-ray</sub> |
|-------|-------------------------|---------------------------|-------------------------|---------------------------|
| Dy-C1 | 2.554                   | 2.491                     | 2.597                   | 2.587                     |
| Dy-C2 | 2.614                   | 2.706                     | 2.545                   | 2.634                     |
| Dy-C3 | 2.616                   | 2.627                     | 2.590                   | 2.534                     |

|          |         |       |         |       |
|----------|---------|-------|---------|-------|
| Dy-C4    | 2.480   | 2.345 | 2.534   | 2.417 |
| Dy-C5    | 2.585   | 2.288 | 2.523   | 2.457 |
| Dy-C6    | 2.579   | 2.234 | 2.594   | 2.399 |
| Dy-C7    | 2.624   | 2.399 | 2.601   | 2.596 |
| Dy-C8    | 2.573   | 2.642 | 2.593   | 2.682 |
| Dy-C9    | 2.593   | 2.702 | 2.589   | 2.558 |
| Dy-C10   | 2.522   | 2.480 | 2.587   | 2.392 |
| Cp-Dy-Cp | 162.151 | 180   | 176.261 | 180   |

**Table S3.** CASSCF+RASSI-SO computed energies of KDs and SINGLE\_ANISO computed  $g$ -tensors of  $\mathbf{2}_{\text{opt}}$ ,  $\mathbf{2}_{\text{x-ray}}$ ,  $\mathbf{3}_{\text{opt}}$ ,  $\mathbf{3}_{\text{x-ray}}$ .

| KDs  | E(cm <sup>-1</sup> ) | $g_x$                       | $g_y$ | $g_z$  | $\theta$ |
|------|----------------------|-----------------------------|-------|--------|----------|
|      |                      | $\mathbf{2}_{\text{opt}}$   |       |        |          |
| 15/2 | 0.0                  | 0.000                       | 0.000 | 20.022 | ~        |
| 13/2 | 551.38               | 0.000                       | 0.000 | 17.025 | 0.389    |
| 11/2 | 817.89               | 0.006                       | 0.006 | 14.477 | 0.881    |
| 9/2  | 961.43               | 0.013                       | 0.026 | 11.862 | 1.305    |
| 7/2  | 1107.83              | 0.551                       | 0.572 | 9.102  | 1.073    |
| 5/2  | 1273.44              | 0.221                       | 1.274 | 6.318  | 1.194    |
| 3/2  | 1420.85              | 7.179                       | 5.339 | 3.258  | 1.752    |
| 1/2  | 1543.32              | 0.794                       | 3.820 | 16.287 | 90.12    |
|      |                      | $\mathbf{2}_{\text{x-ray}}$ |       |        |          |
| 15/2 | 0.0                  | 0.000                       | 0.000 | 20.040 | ~        |
| 13/2 | 690.06               | 0.000                       | 0.000 | 16.958 | 1.688    |
| 11/2 | 952.61               | 0.002                       | 0.003 | 14.607 | 6.975    |
| 9/2  | 1040.94              | 0.072                       | 0.078 | 12.069 | 6.116    |
| 7/2  | 1168.13              | 0.154                       | 0.270 | 9.162  | 5.670    |
| 5/2  | 1353.74              | 3.824                       | 4.223 | 5.961  | 6.670    |
| 3/2  | 1574.57              | 2.965                       | 3.329 | 4.981  | 90.986   |
| 1/2  | 1704.57              | 11.488                      | 9.504 | 1.147  | 0.249    |
|      |                      | $\mathbf{3}_{\text{opt}}$   |       |        |          |

---

|      |         |                          |       |        |        |
|------|---------|--------------------------|-------|--------|--------|
| 15/2 | 0.0000  | 0.000                    | 0.000 | 20.010 | ~      |
| 13/2 | 665.11  | 0.000                    | 0.000 | 16.933 | 0.786  |
| 11/2 | 952.03  | 0.012                    | 0.012 | 14.466 | 2.584  |
| 9/2  | 1073.91 | 0.016                    | 0.040 | 11.884 | 2.026  |
| 7/2  | 1219.15 | 0.285                    | 0.337 | 9.104  | 2.630  |
| 5/2  | 1409.87 | 0.164                    | 0.456 | 6.315  | 1.888  |
| 3/2  | 1599.48 | 3.390                    | 3.542 | 3.945  | 89.897 |
| 1/2  | 1732.60 | 1.069                    | 6.740 | 14.061 | 89.987 |
|      |         | <b>3<sub>x-ray</sub></b> |       |        |        |
| 15/2 | 0.0000  | 0.000                    | 0.000 | 20.010 | ~      |
| 13/2 | 688.26  | 0.000                    | 0.000 | 16.924 | 1.896  |
| 11/2 | 972.47  | 0.024                    | 0.025 | 14.501 | 5.261  |
| 9/2  | 1084.90 | 0.007                    | 0.039 | 11.996 | 6.251  |
| 7/2  | 1227.00 | 0.047                    | 0.076 | 9.162  | 6.215  |
| 5/2  | 1423.94 | 0.286                    | 0.426 | 6.323  | 4.386  |
| 3/2  | 1626.72 | 1.403                    | 2.082 | 3.634  | 5.546  |
| 1/2  | 1761.87 | 12.245                   | 8.748 | 1.161  | 0.759  |

---

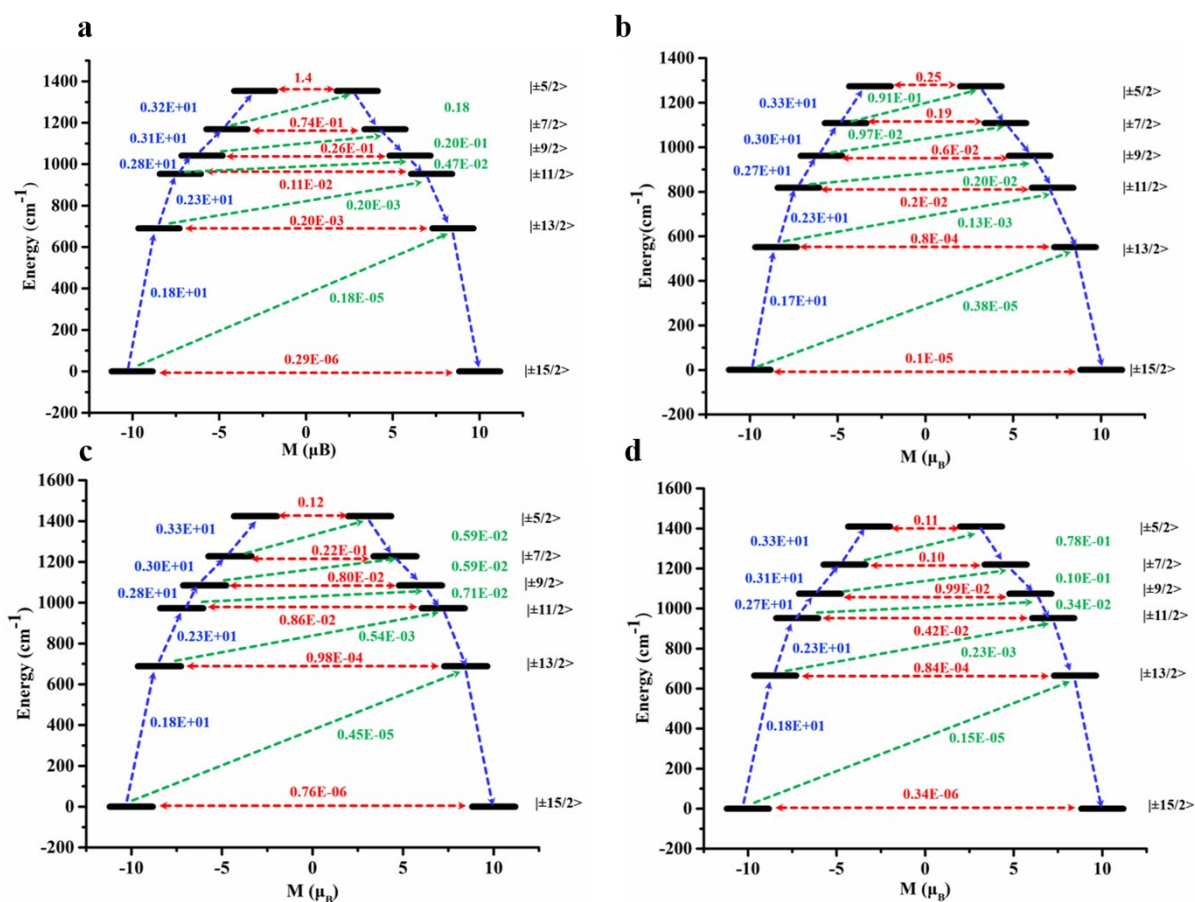

**Figure S2:** *Ab initio* computed magnetisation blockade barriers, along with computed transversal magnetic moments between the connecting pairs for complexes  $2_{\text{opt}}$ ,  $2_{\text{x-ray}}$ ,  $3_{\text{opt}}$ ,  $3_{\text{x-ray}}$ .

### Binding Energy

The binding energy of the title complexes in SWCNT has been determined by using the equation shown below.

$$\Delta E = \{E_{Dy@SWCNT}\} - \{E_{SWCNT} + E_{Dy}\}$$

Where  $\Delta E$  is the binding energy,  $E_{Dy@SWCNT}$  is the energy of the complex in SWCNT;  $E_{SWCNT}$  is the energy of SWCNT whereas  $E_{Dy}$  is the energy of optimized geometry of the title complexes.

**Table S4.** Binding energy of the title complexes inside SWCNT.

| <i>Geometry</i>           | <i>Binding Energy (kJmol<sup>-1</sup>)</i> |
|---------------------------|--------------------------------------------|
| <b>1<sup>  </sup>@CNT</b> | -858.1                                     |
| <b>1<sup>⊥</sup>@CNT</b>  | -594.5                                     |
| <b>2<sup>  </sup>@CNT</b> | -983.6                                     |
| <b>3<sup>  </sup>@CNT</b> | -855.2                                     |

**Table S5.** C-H vibrational frequencies of different C-H bonds of the **1**, **1<sup>||</sup>@CNT** and **2** along with experimentally observed values for **2**.

| <b>1</b> | <b>2</b> | <b>1<sup>  </sup>@CNT</b> | <b>2 (Reported)</b> |
|----------|----------|---------------------------|---------------------|
| 3146.2   | -        | 3303.1                    | -                   |
| 3147.3   | -        | 3306.9                    | -                   |
| 3148.7   | -        | 3317.2                    | -                   |
| 3149.1   | -        | 3346.1                    | -                   |
| 3159.9   | -        | 3356.2                    | -                   |
| 3160.6   | -        | 3365.5                    | -                   |
| 3162.4   | 3162.5   | 3380.9                    | 3181.2              |
| 3162.9   | 3163.9   | 3388.9                    | 3181.3              |
| 3172.4   | 3185.4   | 3399.9                    | 3181.3              |
| 3172.6   | 3189.8   | 3420.5                    | 3181.4              |



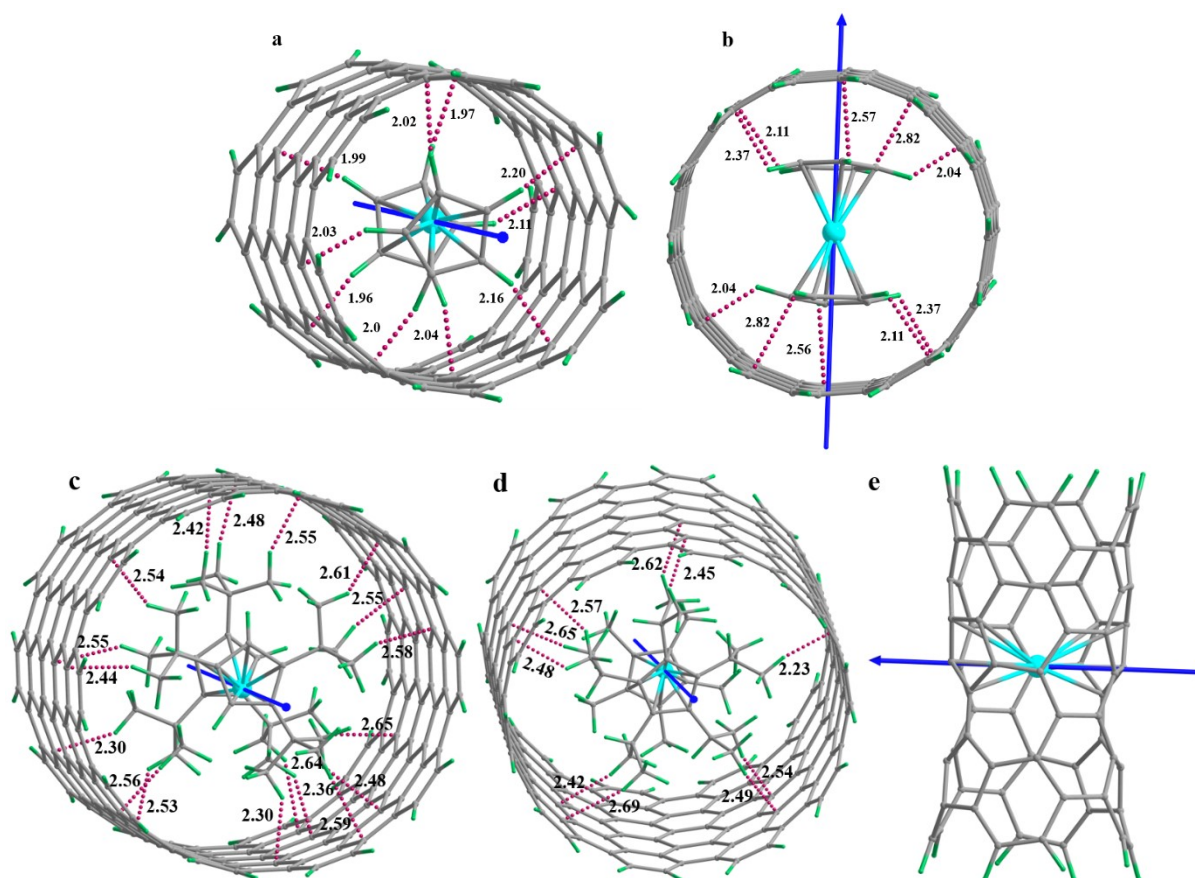

**Figure S3.** DFT optimised structures (a)  $1^{\parallel}$ @CNT (b)  $1^{\perp}$ @CNT (c)  $2^{\parallel}$ @CNT and (d)  $3^{\parallel}$ @CNT (e) model  $Dy^{III}$  ion incorporated inside SWCNT. Dotted purple lines show the closest C-H bond distances. Colour code:  $Dy^{III}$  - cyan, C- grey, and H- green. Blue line arrow shows the ground state  $g_{zz}$  axis.

**Table S6.** CASSCF+RASSI-SO computed energies of all low-lying KDs, and SINGLE\_ANISO computed  $g$ -tensors of  $1^{\parallel}$ @CNT and  $1^{\perp}$ @CNT

| KDs                      | E(cm <sup>-1</sup> ) | $g_x$  | $g_y$ | $g_z$  | $\theta$ |
|--------------------------|----------------------|--------|-------|--------|----------|
| <b>1<sup>∥</sup>@CNT</b> |                      |        |       |        |          |
| 1                        | 0.0                  | 0.000  | 0.000 | 19.938 | ~        |
| 2                        | 563.97               | 0.000  | 0.000 | 17.005 | 0.4      |
| 3                        | 809.73               | 0.014  | 0.014 | 14.457 | 1.9      |
| 4                        | 946.26               | 0.007  | 0.019 | 11.843 | 1.8      |
| 5                        | 1097.11              | 0.115  | 0.127 | 9.115  | 2.6      |
| 6                        | 1274.09              | 0.298  | 0.532 | 6.386  | 2.3      |
| 7                        | 1440.03              | 0.444  | 1.276 | 3.747  | 3.3      |
| 8                        | 1542.74              | 11.373 | 9.654 | 1.228  | 0.2      |
| <b>1<sup>⊥</sup>@CNT</b> |                      |        |       |        |          |
| 1                        | 0.0                  | 0.000  | 0.000 | 19.907 | ~        |
| 2                        | 781.12               | 0.009  | 0.012 | 16.769 | 3.8      |
| 3                        | 1018.68              | 0.103  | 0.171 | 14.261 | 14.0     |
| 4                        | 1091.54              | 0.018  | 0.282 | 12.241 | 13.3     |
| 5                        | 1211.51              | 0.206  | 0.490 | 9.869  | 15.1     |
| 6                        | 1394.95              | 1.295  | 1.977 | 6.409  | 9.2      |
| 7                        | 1600.21              | 3.307  | 3.881 | 7.259  | 89.3     |
| 8                        | 1767.31              | 0.899  | 4.643 | 15.771 | 90.9     |

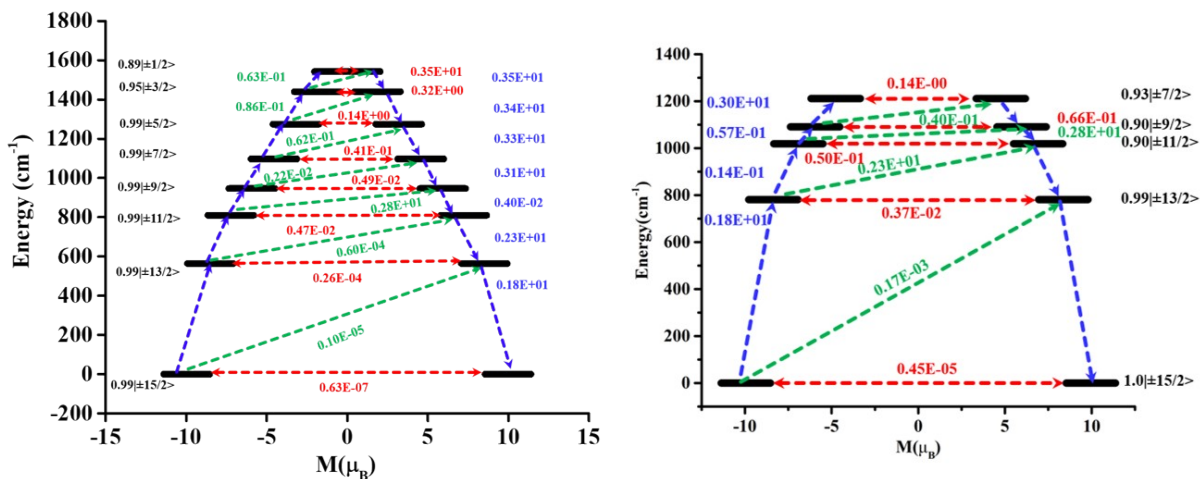

**Figure S4:** *Ab initio* computed magnetisation blockade barriers, along with computed transversal magnetic moments between the connecting pairs for complexes  $1^{\text{II}}@CNT$  and  $1^{\text{I}}@CNT$ .

**Table S7.** CASSCF+RASSI-SO computed energies of all low-lying KDs, and SINGLE\_ANISO computed  $g$ -tensors of  $2^{\text{II}}@CNT$  and  $3^{\text{II}}@CNT$

| KDs                                   | $E(\text{cm}^{-1})$ | $g_{xx}$ | $g_{yy}$ | $g_{zz}$ | $\theta$ |
|---------------------------------------|---------------------|----------|----------|----------|----------|
| <b><math>2^{\text{II}}@CNT</math></b> |                     |          |          |          |          |
| 1                                     | 0.0                 | 0.000    | 0.000    | 19.953   | ~        |
| 2                                     | 413.9               | 0.000    | 0.000    | 17.081   | 1.5      |
| 3                                     | 661.6               | 0.007    | 0.008    | 14.466   | 2.4      |
| 4                                     | 822.9               | 0.039    | 0.052    | 11.797   | 0.9      |
| 5                                     | 964.6               | 0.431    | 0.587    | 9.126    | 1.3      |
| 6                                     | 1082.5              | 3.058    | 4.430    | 5.908    | 1.1      |
| 7                                     | 1163.4              | 2.114    | 5.775    | 11.007   | 90.0     |
| 8                                     | 1293.5              | 0.114    | 0.264    | 18.308   | 89.9     |
| <b><math>3^{\text{II}}@CNT</math></b> |                     |          |          |          |          |
| 1                                     | 0.0                 | 0.000    | 0.000    | 19.910   | ~        |
| 2                                     | 487.4               | 0.000    | 0.000    | 17.028   | 0.8      |

|   |        |       |       |        |      |
|---|--------|-------|-------|--------|------|
| 3 | 749.4  | 0.006 | 0.007 | 14.401 | 1.2  |
| 4 | 910.8  | 0.049 | 0.059 | 11.748 | 1.4  |
| 5 | 1061.3 | 0.313 | 0.435 | 09.118 | 0.9  |
| 6 | 1205.3 | 0.092 | 0.609 | 06.466 | 0.8  |
| 7 | 1314.8 | 6.986 | 5.953 | 03.294 | 1.8  |
| 8 | 1404.2 | 0.743 | 3.299 | 16.258 | 89.8 |

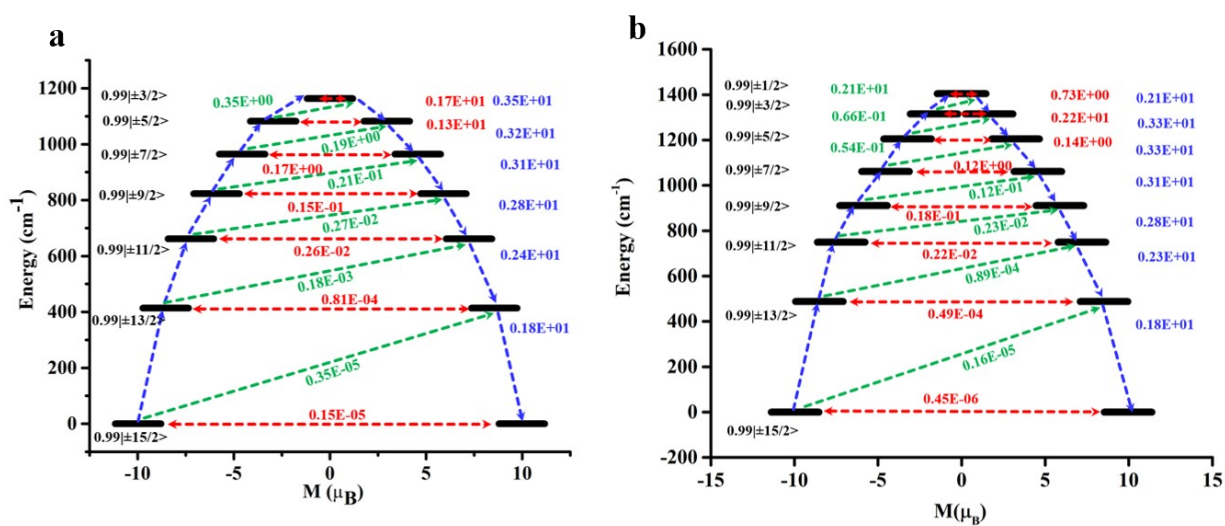

**Figure S5:** *Ab initio* computed magnetisation blockade barriers, along with computed transversal magnetic moments between the connecting pairs for complexes  $2||@CNT$  and  $3||@CNT$ .

**Table S8.** CASSCF+RASSI-SO computed energies of all low-lying KDs, and SINGLE\_ANISO computed  $g$ -tensors of **model Dy ion inbuilt complex**.

| KDs | E(cm-1) | $g_{xx}$ | $g_{yy}$ | $g_{zz}$ | $\theta$ |
|-----|---------|----------|----------|----------|----------|
| 1   | 0.00    | 0.001    | 0.006    | 19.34    | ~        |
| 2   | 91.31   | 1.398    | 3.335    | 13.504   | 2.4      |
| 3   | 146.77  | 4.123    | 5.098    | 7.001    | 13.7     |
| 4   | 229.94  | 2.213    | 2.751    | 8.932    | 89.9     |
| 5   | 341.14  | 0.006    | 1.084    | 11.53    | 89.9     |
| 6   | 453.16  | 0.468    | 0.536    | 14.149   | 89.9     |
| 7   | 566.67  | 0.049    | 0.135    | 16.792   | 89.9     |
| 8   | 660.16  | 0.06     | 0.084    | 19.539   | 89.9     |

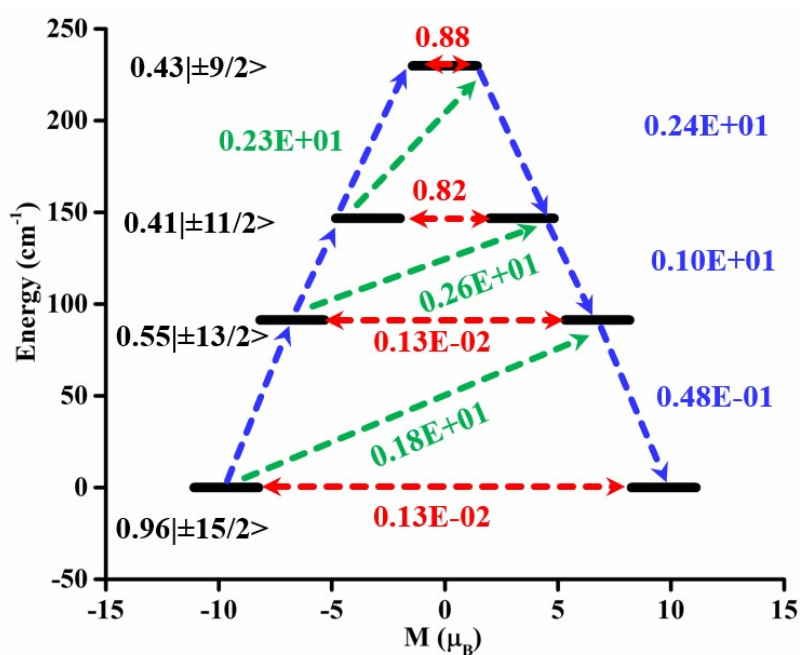

**Figure S6.** *Ab initio* computed magnetisation blockade barriers, along with computed transversal magnetic moments between the connecting pairs for **model Dy ion inbuilt complex**.

**Table S9.** Comparison of energy barrier of the title complexes.

| Geometry                                | Calculated energy barrier<br>( $U_{cal}$ ) ( $\text{cm}^{-1}$ ) |            |                    | Effective energy barrier<br>( $U_{eff}$ ) ( $\text{cm}^{-1}$ ) (reported) |
|-----------------------------------------|-----------------------------------------------------------------|------------|--------------------|---------------------------------------------------------------------------|
|                                         | optimised                                                       | Inside CNT | XRAY/Model<br>Str. |                                                                           |
| <b>1</b>                                | -                                                               | -          | 921.3              | -                                                                         |
| <b>2</b>                                | 1273                                                            | -          | 1354               | 1277                                                                      |
| <b>3</b>                                | 1409                                                            | -          | 1424               | 1541                                                                      |
| <b>1<sup>  </sup>@CNT</b>               | -                                                               | 1543       | -                  | -                                                                         |
| <b>1<sup>⊥</sup>@CNT</b>                | -                                                               | 1211       | -                  | -                                                                         |
| <b>2<sup>  </sup>@CNT</b>               | -                                                               | 1163       | -                  | -                                                                         |
| <b>3<sup>  </sup>@CNT</b>               | -                                                               | 1404       | -                  | -                                                                         |
| <b>model Dy ion<br/>inbuilt complex</b> | -                                                               | 230        | -                  | -                                                                         |

**LoProp Charges****Table S10.** LoProp charges on atoms of molecule **1** without SWCNT and with SWCNT and the difference ( $\Delta\delta$ )

| Atom | <b>1</b> | <b>1<sup>  </sup>@CNT</b> |                | <b>1<sup>⊥</sup>@CNT</b> |                |
|------|----------|---------------------------|----------------|--------------------------|----------------|
|      | Charge   | Charge                    | $\Delta\delta$ | Charge                   | $\Delta\delta$ |
| Dy   | 2.355    | 2.363                     | 0.008          | 2.460                    | 0.105          |
| C1   | -0.276   | -0.243                    | 0.033          | -0.315                   | -0.039         |
| C2   | -0.273   | -0.315                    | -0.042         | -0.320                   | -0.047         |
| C3   | -0.268   | -0.341                    | -0.073         | -0.256                   | -0.012         |
| C4   | -0.271   | -0.388                    | -0.117         | -0.298                   | -0.027         |
| C5   | -0.272   | -0.235                    | 0.037          | -0.304                   | -0.032         |

|     |        |        |        |        |        |
|-----|--------|--------|--------|--------|--------|
| C6  | -0.271 | -0.329 | -0.058 | -0.298 | -0.027 |
| C7  | -0.272 | -0.304 | -0.032 | -0.304 | -0.032 |
| C8  | -0.277 | -0.327 | -0.050 | -0.315 | -0.038 |
| C9  | -0.273 | -0.340 | -0.067 | -0.320 | -0.047 |
| C10 | -0.268 | -0.261 | 0.007  | -0.256 | 0.012  |
| H1  | 0.136  | 0.122  | -0.014 | 0.127  | -0.009 |
| H2  | 0.136  | 0.110  | -0.026 | 0.110  | -0.026 |
| H3  | 0.137  | 0.110  | -0.027 | 0.134  | -0.003 |
| H4  | 0.137  | 0.119  | -0.018 | 0.130  | -0.007 |
| H5  | 0.137  | 0.114  | -0.023 | 0.112  | -0.025 |
| H6  | 0.137  | 0.122  | -0.015 | 0.130  | -0.007 |
| H7  | 0.137  | 0.129  | -0.008 | 0.112  | -0.025 |
| H8  | 0.136  | 0.119  | -0.017 | 0.127  | -0.009 |
| H9  | 0.136  | 0.111  | -0.025 | 0.110  | -0.026 |
| H10 | 0.137  | 0.122  | -0.015 | 0.134  | -0.003 |

**Table S11.** LoProp charges on atoms of molecules **2** and **3** without SWCNT and with SWCNT and the difference ( $\Delta\delta$ )

| Atom | 2      | 2  @CNT | 3       | 3  @CNT |
|------|--------|---------|---------|---------|
| Dy   | 2.299  | 2.291   | 2.412   | 2.296   |
| C1   | -0.212 | -0.184  | -0.132  | -0.1925 |
| C2   | -0.298 | -0.318  | -0.151  | -0.2115 |
| C3   | -0.138 | -0.131  | -0.143  | -0.1799 |
| C4   | -0.342 | -0.298  | -0.1668 | -0.1627 |
| C5   | -0.165 | -0.168  | -0.1463 | -0.1830 |
| C6   | -0.217 | -0.193  | -0.1565 | -0.1624 |
| C7   | -0.164 | -0.171  | -0.2028 | -0.1506 |
| C8   | -0.337 | -0.310  | -0.2125 | -0.1234 |
| C9   | -0.299 | -0.112  | -0.2486 | -0.1854 |
| C10  | -0.123 | -0.305  | -0.2269 | -0.1422 |
| C    | -0.364 | -0.274  | -0.2687 | -0.2870 |
| C    | -0.358 | -0.278  | -0.2731 | -0.2892 |
| C    | -0.366 | -0.283  | -0.2742 | -0.2947 |
| C    | 0.087  | 0.062   | -0.2760 | -0.2979 |

|   |        |        |         |         |
|---|--------|--------|---------|---------|
| C | -0.357 | -0.279 | -0.2737 | -0.2910 |
| C | -0.371 | -0.286 | -0.0374 | -0.0469 |
| C | -0.365 | -0.290 | -0.2600 | -0.2963 |
| C | 0.100  | 0.079  | -0.2701 | -0.2872 |
| C | -0.358 | -0.280 | -0.0356 | -0.0489 |
| C | -0.395 | -0.291 | -0.2593 | -0.2907 |
| C | -0.363 | -0.284 | -0.2624 | -0.2792 |
| C | 0.091  | 0.070  | -0.0326 | -0.0450 |
| C | -0.368 | -0.281 | -0.2846 | -0.3242 |
| C | -0.364 | -0.282 | -0.2619 | -0.2800 |
| C | -0.357 | -0.283 | -0.0327 | -0.0412 |
| C | 0.087  | 0.067  | -0.2658 | -0.2843 |
| C | -0.370 | -0.286 | -0.2562 | -0.2858 |
| C | -0.355 | -0.283 | -0.0323 | -0.0418 |
| C | -0.365 | -0.286 | -0.2627 | -0.2804 |
| C | 0.096  | 0.079  | -0.2653 | -0.2854 |
| C | -0.358 | -0.316 |         |         |
| C | -0.394 | -0.289 |         |         |
| C | -0.362 | -0.282 |         |         |
| C | 0.089  | 0.072  |         |         |
| H | 0.123  | 0.104  | 0.1117  | 0.1100  |
| H | 0.123  | 0.097  | 0.0872  | 0.0960  |
| H | 0.129  | 0.098  | 0.1002  | 0.1018  |
| H | 0.131  | 0.104  | 0.1160  | 0.1143  |
| H | 0.125  | 0.102  | 0.1013  | 0.1043  |
| H | 0.103  | 0.047  | 0.0866  | 0.0892  |
| H | 0.126  | 0.033  | 0.0854  | 0.0806  |
| H | 0.123  | 0.109  | 0.1145  | 0.1189  |
| H | 0.122  | 0.097  | 0.1015  | 0.1098  |
| H | 0.119  | 0.098  | 0.0865  | 0.0799  |
| H | 0.129  | 0.081  | 0.1025  | 0.1102  |
| H | 0.107  | 0.099  | 0.1140  | 0.1210  |
| H | 0.119  | 0.072  | 0.1141  | 0.1146  |
| H | 0.110  | 0.094  | 0.0944  | 0.0942  |
| H | 0.128  | 0.087  | 0.0992  | 0.1059  |



|   |       |       |        |        |
|---|-------|-------|--------|--------|
| H | 0.134 | 0.096 | 0.0862 | 0.1001 |
| H | 0.134 | 0.097 | 0.1006 | 0.1041 |
| H | 0.121 | 0.084 | 0.0875 | 0.0905 |
| H | 0.086 | 0.100 | 0.1013 | 0.1049 |
| H | 0.117 | 0.100 | 0.0834 | 0.0771 |
| H | 0.126 | 0.088 | 0.1087 | 0.1113 |
| H | 0.150 | 0.093 | 0.0432 | 0.0628 |
| H | 0.134 | 0.098 | 0.0877 | 0.1028 |
| H | 0.091 | 0.068 | 0.0983 | 0.1062 |
| H | 0.113 | 0.097 | 0.0843 | 0.0906 |
| H | 0.120 | 0.084 | 0.0965 | 0.1011 |
| H | 0.130 | 0.096 | 0.0892 | 0.0985 |
| H | 0.135 | 0.092 | 0.1031 | 0.1142 |
| H | 0.135 | 0.119 | 0.0463 | 0.0298 |
| H | 0.102 | 0.030 | 0.0894 | 0.0994 |
| H | 0.131 | 0.096 | 0.0980 | 0.1041 |
| H | 0.125 | 0.100 | 0.0851 | 0.0933 |
| H | 0.123 | 0.068 | 0.0952 | 0.0968 |
| H | 0.129 | 0.094 | 0.0742 | 0.0966 |
| H | 0.103 | 0.100 | 0.1089 | 0.1206 |
| H | 0.120 | 0.093 | 0.0738 | 0.0605 |
| H | 0.087 | 0.099 | 0.0796 | 0.0944 |
| H | 0.120 | 0.101 | 0.0409 | 0.0632 |
| H | 0.134 | 0.080 | 0.0936 | 0.0883 |
| H | 0.119 | 0.088 | 0.1016 | 0.0952 |
| H | 0.129 | 0.087 | 0.0959 | 0.0986 |
| H | 0.124 | 0.092 | 0.0898 | 0.0960 |
| H | 0.122 | 0.090 | 0.0970 | 0.0989 |
| H | 0.121 | 0.091 | 0.0846 | 0.0892 |
| H | 0.129 | 0.086 | 0.0463 | 0.0736 |
| H | 0.122 | 0.087 | 0.0874 | 0.0869 |
| H | 0.112 | 0.083 | 0.1083 | 0.0922 |
| H | 0.103 | 0.062 | 0.0859 | 0.0925 |
| H | 0.090 | 0.085 | 0.0937 | 0.0996 |
| H | 0.150 | 0.114 | 0.0989 | 0.0979 |

|   |       |       |  |  |
|---|-------|-------|--|--|
| H | 0.110 | 0.102 |  |  |
| H | 0.132 | 0.126 |  |  |
| H | 0.129 | 0.082 |  |  |
| H | 0.118 | 0.084 |  |  |
| H | 0.133 | 0.083 |  |  |
| H | 0.126 | 0.103 |  |  |
| H | 0.135 | 0.123 |  |  |
| H | 0.134 | 0.122 |  |  |

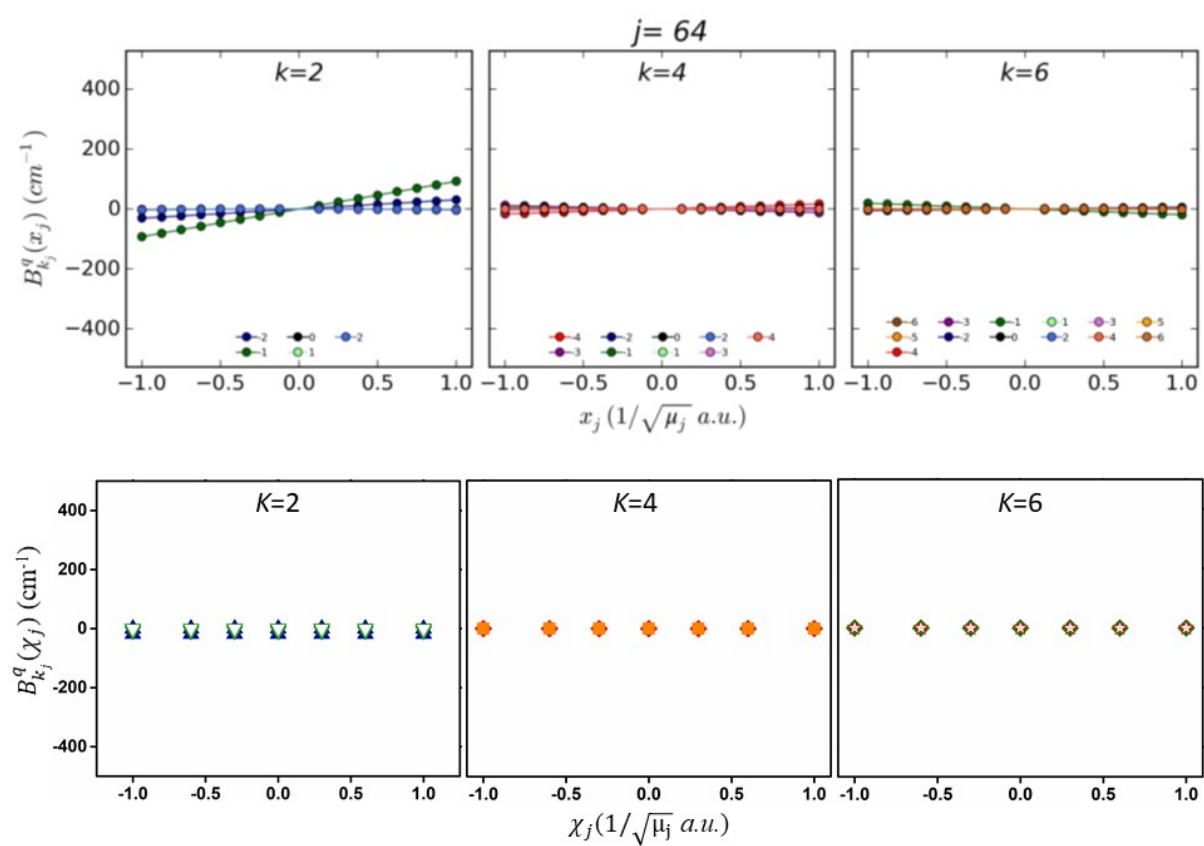

**Figure S7a.** Plots showing the crystal field parameters for the complex 1||@CNT

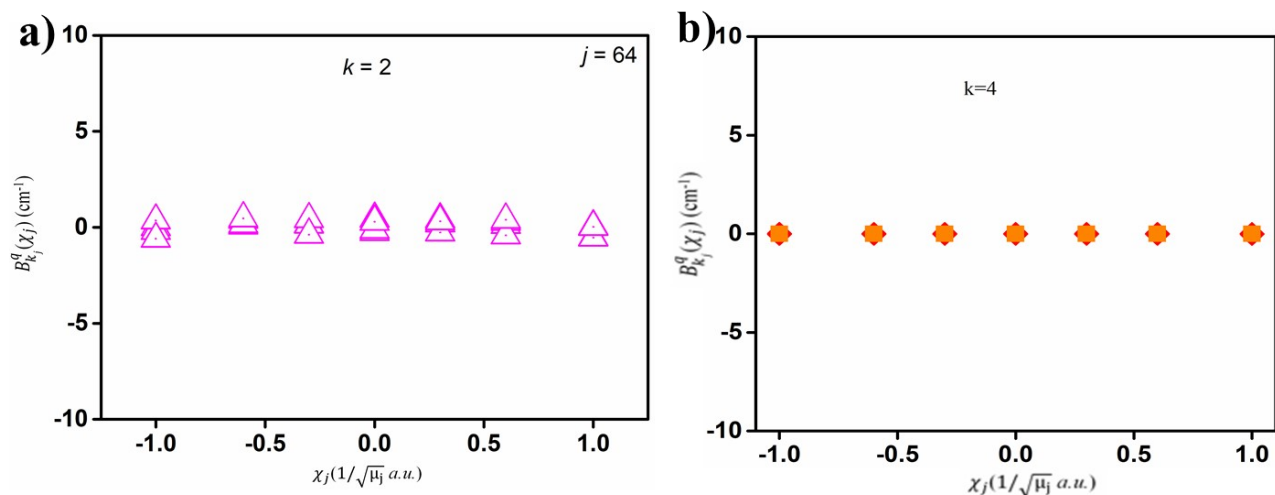

**Figure S7b.** Plots showing the crystal field parameters for the complex **1**||@CNT

**Table S12.** CASSCF+RASSI-SO computed energies of all low-lying KDs, and SINGLE\_ANISO

computed  $g$ -tensors of of **1**||@CNT at the displacement,  $\chi_j\left(\frac{1}{\sqrt{\mu_j}}a.u.\right) = 0.00$ , **0.3, 0.6, 1.0, (-0.3), (-0.6)** and **(-1.0)**.

| KDs | E(cm <sup>-1</sup> ) | $g_{xx}$                                               | $g_{yy}$ | $g_{zz}$ |
|-----|----------------------|--------------------------------------------------------|----------|----------|
|     |                      | $\chi_j\left(\frac{1}{\sqrt{\mu_j}}a.u.\right) = 0.00$ |          |          |
| 1   | 0.0                  | 0.000                                                  | 0.000    | 20.007   |
| 2   | 553.5                | 0.000                                                  | 0.000    | 17.020   |
| 3   | 792.0                | 0.018                                                  | 0.019    | 14.499   |
| 4   | 912.8                | 0.012                                                  | 0.023    | 11.885   |
| 5   | 1053.6               | 0.048                                                  | 0.059    | 9.123    |
| 6   | 1228.0               | 0.377                                                  | 0.476    | 6.362    |
| 7   | 1397.8               | 0.370                                                  | 1.224    | 3.711    |
| 8   | 1505.7               | 11.352                                                 | 9.753    | 1.212    |

---


$$\chi_j\left(\frac{1}{\sqrt{\mu_j}}a.u.\right) = 0.3$$

|   |        |        |       |        |
|---|--------|--------|-------|--------|
| 1 | 0.0    | 0.000  | 0.000 | 20.007 |
| 2 | 552.1  | 0.000  | 0.000 | 17.023 |
| 3 | 790.2  | 0.018  | 0.019 | 14.500 |
| 4 | 911.4  | 0.012  | 0.024 | 11.900 |
| 5 | 1051.8 | 0.060  | 0.072 | 09.138 |
| 6 | 1225.6 | 0.682  | 0.808 | 06.359 |
| 7 | 1395.4 | 0.362  | 1.811 | 03.701 |
| 8 | 1503.1 | 11.621 | 9.477 | 1.207  |

$$\chi_j\left(\frac{1}{\sqrt{\mu_j}}a.u.\right) = 0.6$$

|   |        |        |       |        |
|---|--------|--------|-------|--------|
| 1 | 0.0    | 0.000  | 0.000 | 20.007 |
| 2 | 553.0  | 0.000  | 0.000 | 17.021 |
| 3 | 791.4  | 0.018  | 0.019 | 14.500 |
| 4 | 912.3  | 0.012  | 0.023 | 11.889 |
| 5 | 1053.0 | 0.050  | 0.006 | 9.127  |
| 6 | 1227.3 | 0.450  | 0.553 | 6.362  |
| 7 | 1397.1 | 0.314  | 1.315 | 3.710  |
| 8 | 1504.9 | 11.370 | 9.736 | 1.212  |

$$\chi_j\left(\frac{1}{\sqrt{\mu_j}}a.u.\right) = 1.0$$

|   |       |       |       |        |
|---|-------|-------|-------|--------|
| 1 | 0.0   | 0.000 | 0.000 | 20.007 |
| 2 | 552.6 | 0.000 | 0.000 | 17.022 |
| 3 | 790.8 | 0.018 | 0.019 | 14.500 |
| 4 | 911.9 | 0.012 | 0.023 | 11.893 |

---

---

|   |        |        |       |        |
|---|--------|--------|-------|--------|
| 5 | 1052.5 | 0.053  | 0.064 | 09.131 |
| 6 | 1226.6 | 0.542  | 0.652 | 06.361 |
| 7 | 1396.3 | 0.298  | 1.490 | 03.707 |
| 8 | 1504.1 | 11.449 | 9.655 | 1.211  |

$$\chi_j\left(\frac{1}{\sqrt{\mu_j}}a.u.\right) = -0.3$$

|   |        |        |       |        |
|---|--------|--------|-------|--------|
| 1 | 0.0    | 0.000  | 0.000 | 20.007 |
| 2 | 555.5  | 0.000  | 0.000 | 17.016 |
| 3 | 794.3  | 0.019  | 0.019 | 14.494 |
| 4 | 914.5  | 0.012  | 0.023 | 11.875 |
| 5 | 1055.4 | 0.048  | 0.059 | 09.116 |
| 6 | 1230.1 | 0.388  | 0.491 | 06.358 |
| 7 | 1400.4 | 0.724  | 1.620 | 03.701 |
| 8 | 1509.0 | 11.719 | 9.372 | 1.205  |

$$\chi_j\left(\frac{1}{\sqrt{\mu_j}}a.u.\right) = -0.6$$

|   |        |        |       |        |
|---|--------|--------|-------|--------|
| 1 | 0.0    | 0.000  | 0.000 | 20.007 |
| 2 | 554.0  | 0.000  | 0.000 | 17.019 |
| 3 | 792.6  | 0.018  | 0.019 | 14.498 |
| 4 | 913.3  | 0.012  | 0.023 | 11.881 |
| 5 | 1054.1 | 0.047  | 0.058 | 09.120 |
| 6 | 1228.7 | 0.335  | 0.433 | 06.361 |
| 7 | 1398.6 | 0.462  | 1.233 | 03.710 |
| 8 | 1506.6 | 11.401 | 9.702 | 1.211  |

$$\chi_j\left(\frac{1}{\sqrt{\mu_j}}a.u.\right) = -1.0$$


---

---

|   |        |        |       |        |
|---|--------|--------|-------|--------|
| 1 | 0.0    | 0.000  | 0.000 | 20.007 |
| 2 | 554.6  | 0.000  | 0.000 | 17.018 |
| 3 | 793.3  | 0.019  | 0.019 | 14.497 |
| 4 | 913.8  | 0.012  | 0.023 | 11.878 |
| 5 | 1054.6 | 0.047  | 0.058 | 09.118 |
| 6 | 1229.3 | 0.332  | 0.432 | 06.360 |
| 7 | 1399.4 | 0.572  | 1.344 | 03.707 |
| 8 | 1507.6 | 11.510 | 9.590 | 1.209  |

---

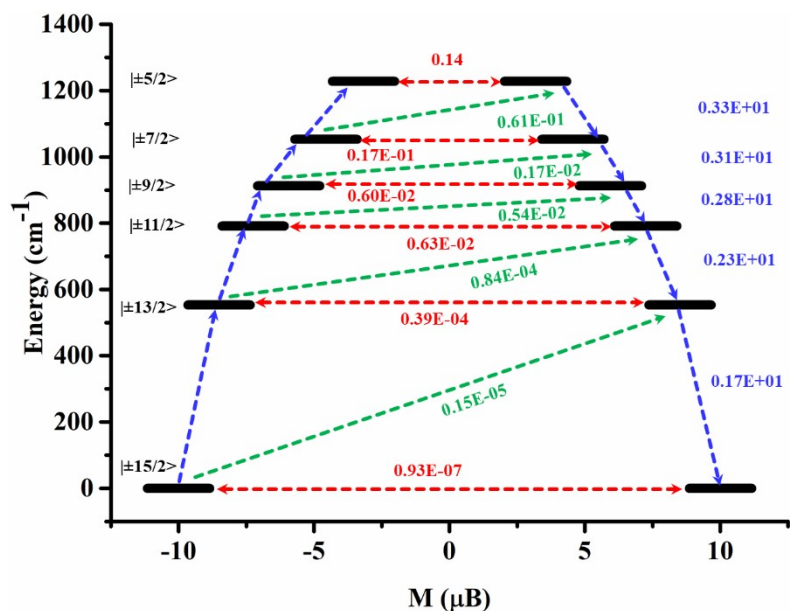

**Figure S8:** *Ab initio* computed magnetisation blockade barriers, along with computed transversal magnetic moments between the connecting pairs for complex **1||@CNT** at a displacement of

$$\chi_j\left(\frac{1}{\sqrt{\mu_j}}a.u.\right) = 0.0$$

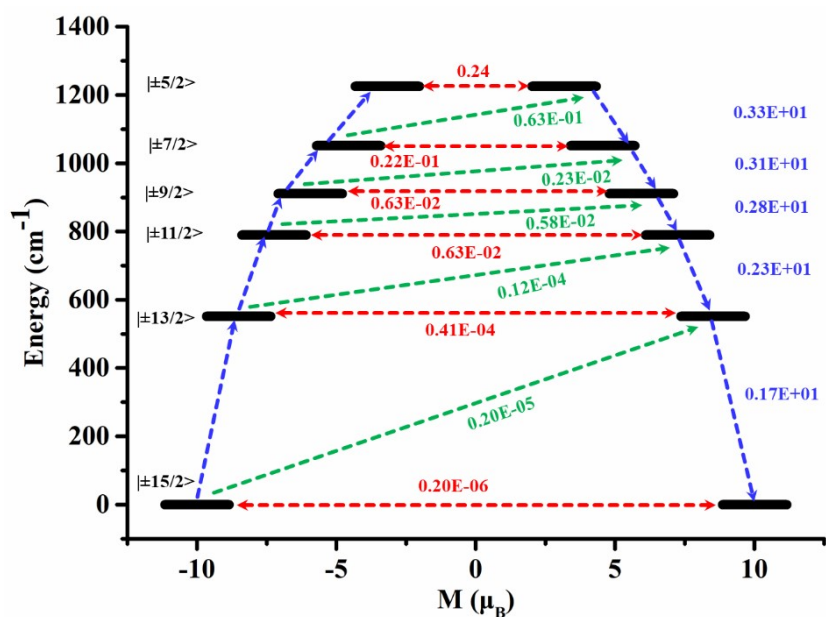

**Figure S9:** *Ab initio* computed magnetisation blockade barriers, along with computed transversal magnetic moments between the connecting pairs for complex **1||@CNT** at a displacement of

$$\chi_j\left(\frac{1}{\sqrt{\mu_j}}a.u.\right) = 0.3$$

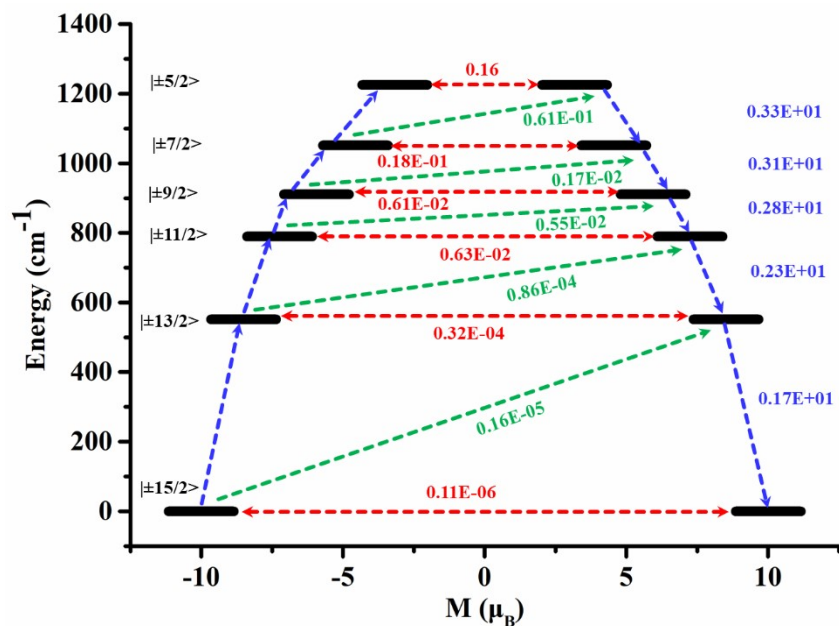

**Figure S10:** *Ab initio* computed magnetisation blockade barriers, along with computed transversal magnetic moments between the connecting pairs for complex **1||@CNT** at a

displacement of  $\chi_j\left(\frac{1}{\sqrt{\mu_j}}a.u.\right) = 0.6$

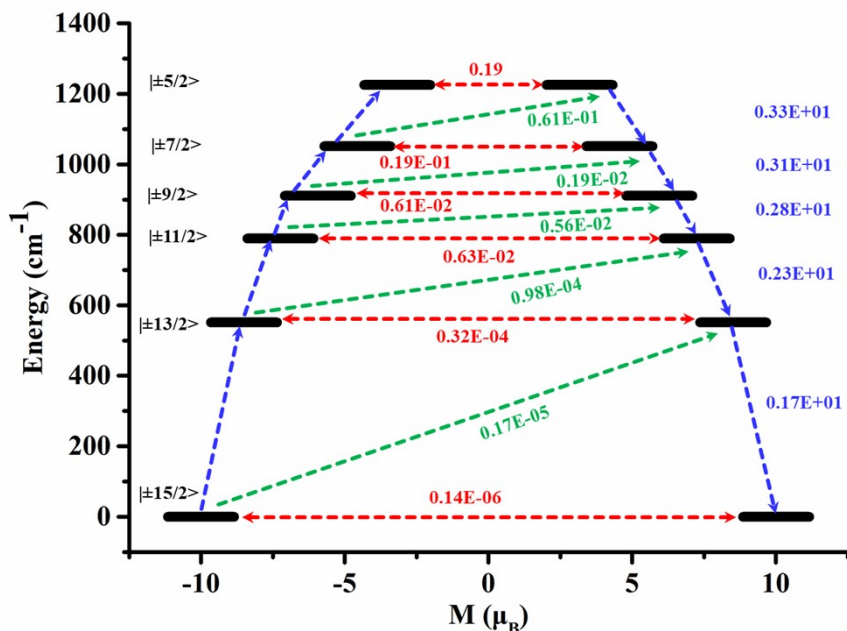

**Figure S11:** *Ab initio* computed magnetisation blockade barriers, along with computed transversal magnetic moments between the connecting pairs for complex **1||@CNT** at a

displacement of  $\chi_j\left(\frac{1}{\sqrt{\mu_j}}a.u.\right) = 1.0$



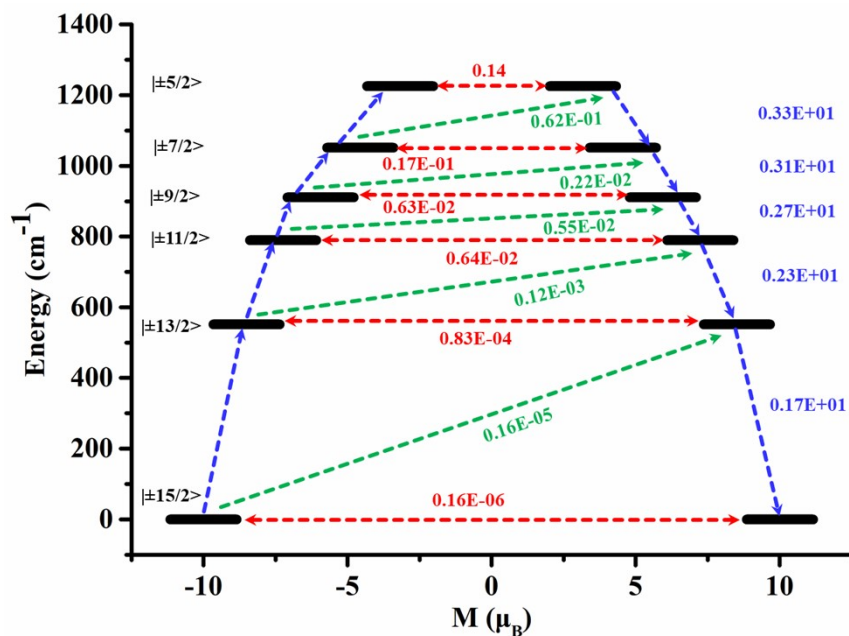

**Figure S12:** *Ab initio* computed magnetisation blockade barriers, along with computed transversal magnetic moments between the connecting pairs for complex 1||@CNT at a

displacement of  $\chi_j\left(\frac{1}{\sqrt{\mu_j}}a.u.\right) = -0.3$

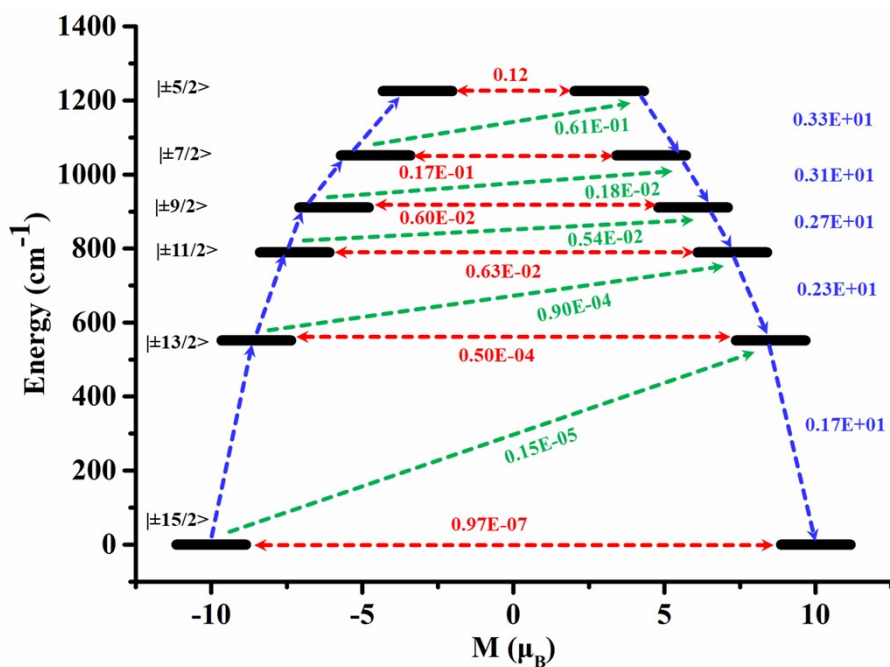

**Figure S13:** *Ab initio* computed magnetisation blockade barriers, along with computed transversal magnetic moments between the connecting pairs for complex **1**||@CNT at a

displacement of  $\chi_j\left(\frac{1}{\sqrt{\mu_j}}a.u.\right) = -0.6$

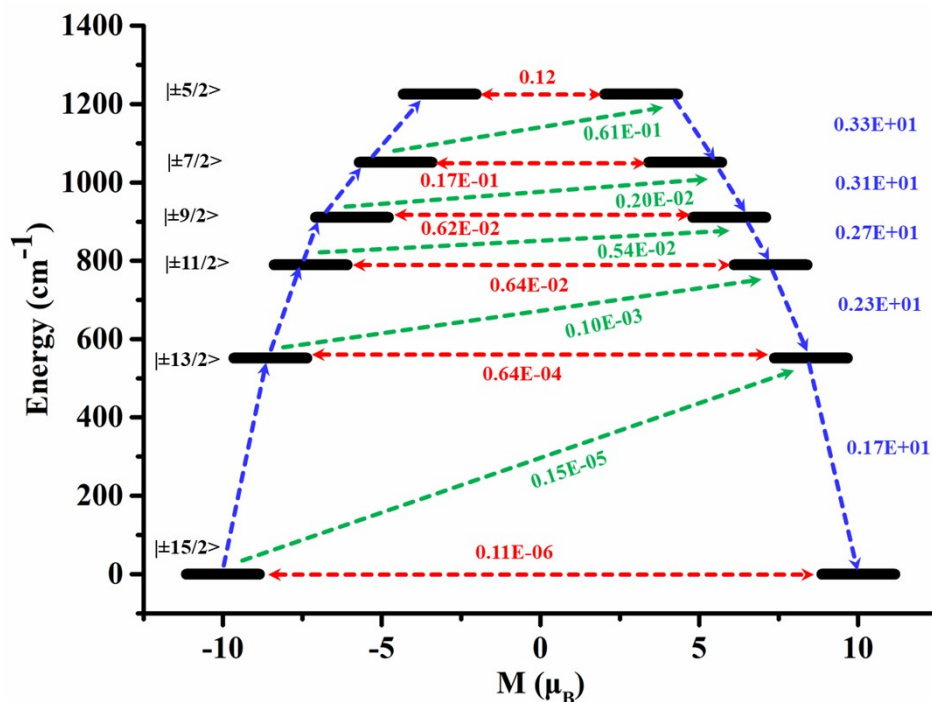

**Figure S14:** *Ab initio* computed magnetisation blockade barriers, along with computed transversal magnetic moments between the connecting pairs for complex **1**||@CNT at a

displacement of  $\chi_j\left(\frac{1}{\sqrt{\mu_j}}a.u.\right) = -1.0$

**Table S13.** CASSCF+RASSI-SO computed energies of all low-lying KDs, and SINGLE\_ANISO computed *g*-tensors of **2-CA**||@CNT.

| KDs | E(cm-1) | $g_{xx}$ | $g_{yy}$ | $g_{zz}$ |
|-----|---------|----------|----------|----------|
| 1   | 0.00    | 0.000    | 0.000    | 20.148   |
| 2   | 419.3   | 0.000    | 0.000    | 17.162   |
| 3   | 670.7   | 0.002    | 0.002    | 14.521   |
| 4   | 834.0   | 0.017    | 0.021    | 11.857   |
| 5   | 980.3   | 0.230    | 0.307    | 9.189    |
| 6   | 1107.9  | 2.751    | 3.579    | 6.123    |
| 7   | 1198.2  | 2.381    | 6.246    | 10.562   |
| 8   | 1327.4  | 0.200    | 0.546    | 18.240   |

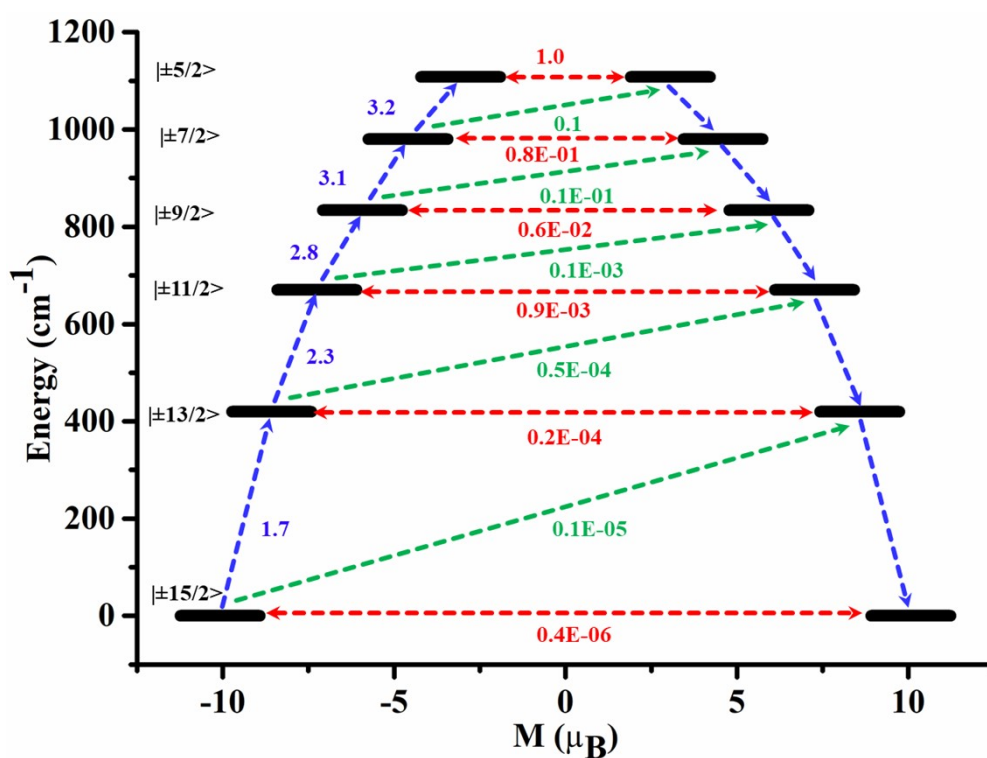

**Figure S15.** *Ab initio* computed magnetisation blockade barriers, along with computed transversal magnetic moments between the connecting pairs for 2-CA@CNT.

**Table S14.** CASSCF+RASSI-SO computed energies of all low-lying KDs, and SINGLE\_ANISO computed  $g$ -tensors of 3-CA@CNT.

| KDs | E(cm-1) | $g_{xx}$ | $g_{yy}$ | $g_{zz}$ |
|-----|---------|----------|----------|----------|
| 1   | 0.00    | 0.000    | 0.000    | 20.000   |
| 2   | 522.5   | 0.000    | 0.000    | 17.308   |
| 3   | 784.8   | 0.002    | 0.002    | 14.453   |
| 4   | 934.3   | 0.014    | 0.018    | 11.818   |
| 5   | 1084.2  | 0.006    | 1.084    | 11.538   |
| 6   | 1245.7  | 0.061    | 0.384    | 6.417    |

|   |        |       |       |        |
|---|--------|-------|-------|--------|
| 7 | 1387.3 | 3.370 | 3.616 | 4.347  |
| 8 | 1482.2 | 1.067 | 6.483 | 14.147 |

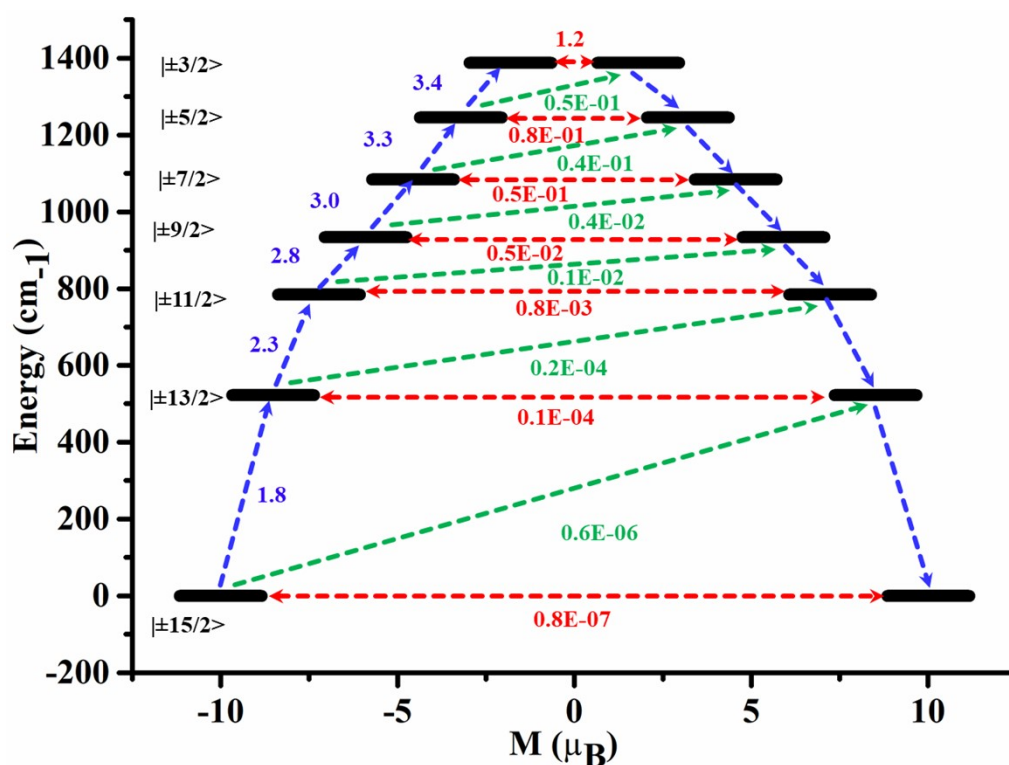

**Figure S16.** *Ab initio* computed magnetisation blockade barriers, along with computed transversal magnetic moments between the connecting pairs for 3-CA@CNT.

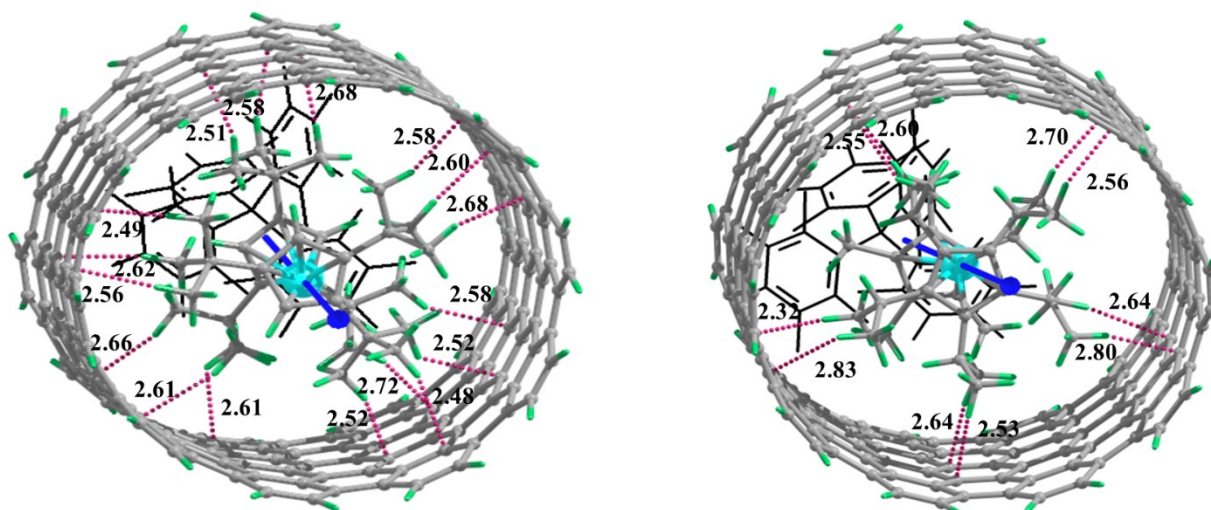

**Figure S17.** DFT optimized structures, Front view of a) 2-CA<sup>II</sup>@CNT b) 3<sup>II</sup>@CNT. Dotted purple lines show the closest C-H bond distances. Colour code: Dy<sup>III</sup> - cyan, C- grey, and H- green. Blueline arrow shows the  $g_{zz}$  axis. In back, black colour chemdraw structure is counter anion [B(C<sub>6</sub>F<sub>5</sub>)<sub>4</sub>]<sup>-</sup>

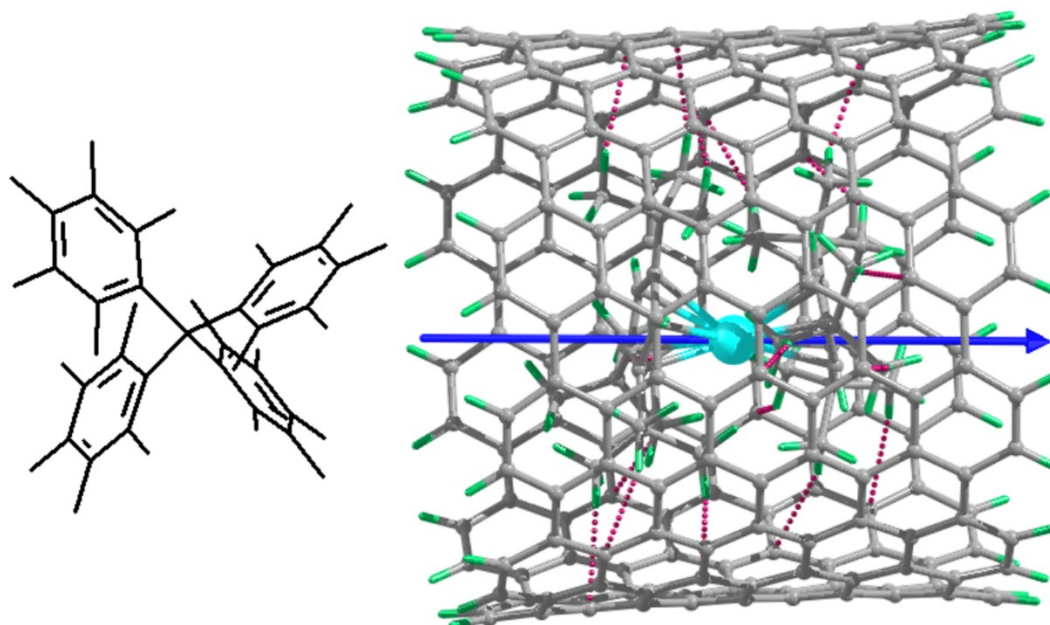

**Figure S18.** DFT optimized structures, Side view of a) 2-CA<sup>II</sup>@CNT. Dotted purple lines show the closest C-H bond distances. Colour code: Dy<sup>III</sup> - cyan, C- grey, and H- green. Blueline arrow shows the  $g_{zz}$  axis. In back, black colour chemdraw structure is counter anion [B(C<sub>6</sub>F<sub>5</sub>)<sub>4</sub>]<sup>-</sup>

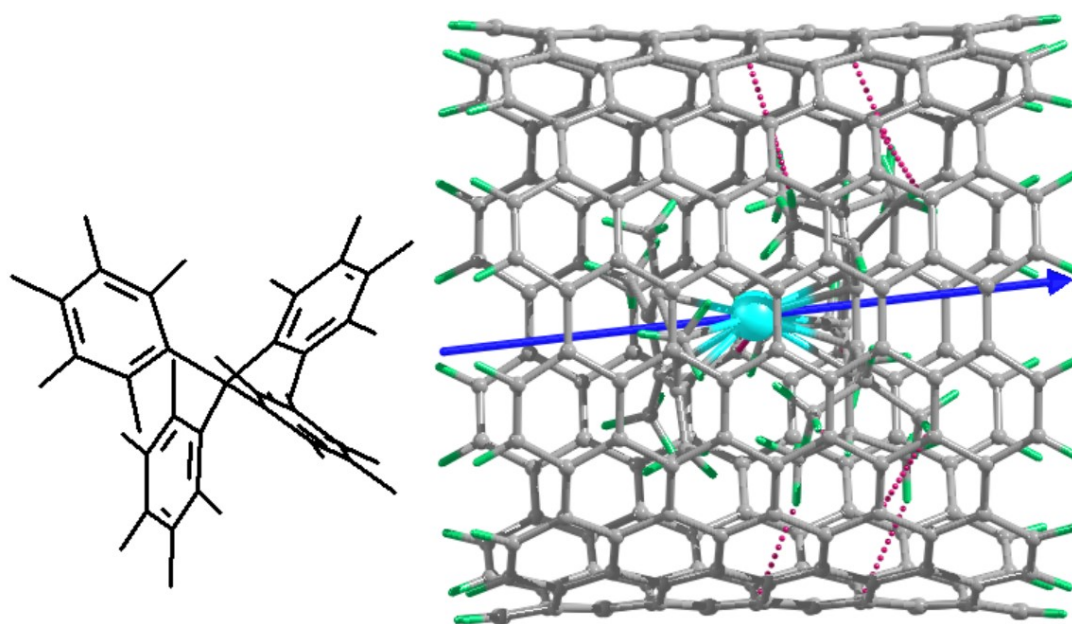

**Figure S19.** DFT optimized structures, Side view of a)  $3\text{-CA}^{\text{II}}@ \text{CNT}$ . Dotted purple lines show the closest C-H bond distances. Colour code:  $\text{Dy}^{\text{III}}$  - cyan, C- grey, and H- green. Blue line arrow shows the  $g_{zz}$  axis. In back, black colour chemdraw structure is counter anion  $[\text{B}(\text{C}_6\text{F}_5)_4]^-$

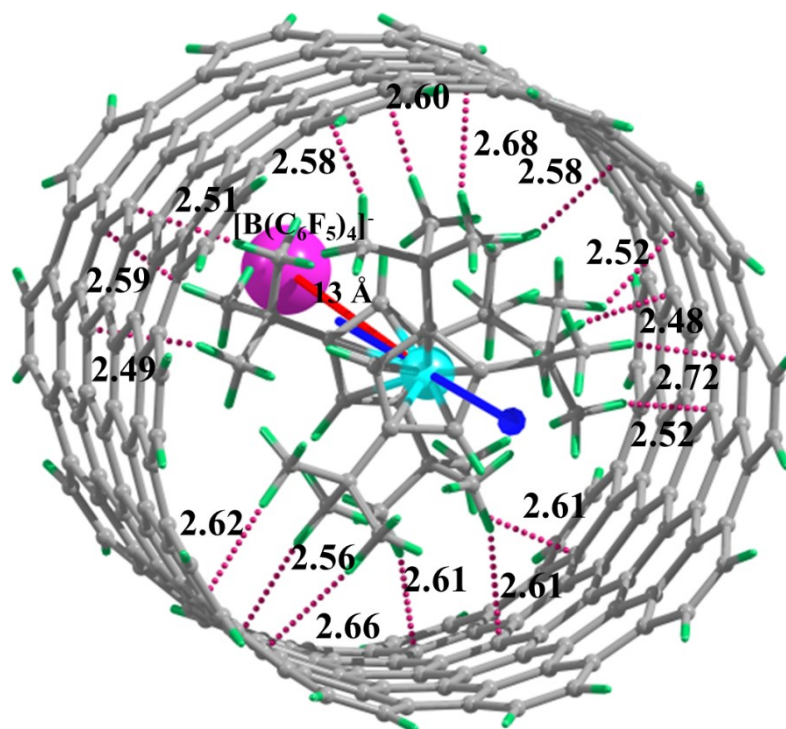

**Figure S20.** DFT optimized structures a)  $3\text{-CA}^{\text{II}}@ \text{CNT}$  (see Fig. 1 for colour code and description). For visibility,  $[\text{B}(\text{C}_6\text{F}_5)_4]^-$  is shown as a pink sphere.

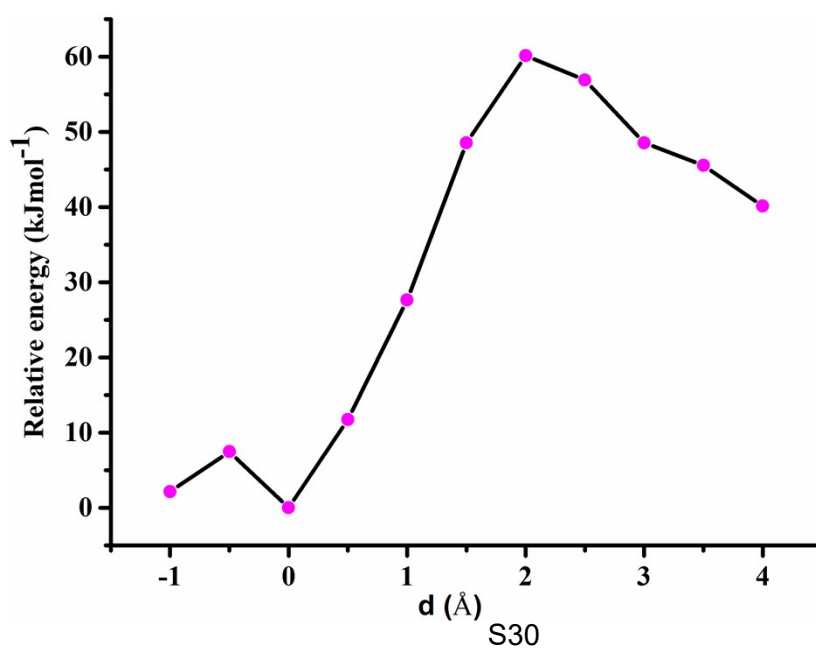

**Figure S21.** Relative energy vs displacement graph, when inside the CNT of  $1^{II}@CNT$ , the complex is displaced by 0.5 Å along the length of CNT.

#### References:

1. B. G. Lippert, J. H. PARRINELLO and MICHELE, *Mol. Phys.*, 1997, **92**, 477-488.
2. J. VandeVondele, M. Krack, F. Mohamed, M. Parrinello, T. Chassaing and J. Hutter, *Comput. Phys. Commun.*, 2005, **167**, 103-128.
3. T. D. Kühne, M. Iannuzzi, M. Del Ben, V. V. Rybkin, P. Seewald, F. Stein, T. Laino, R. Z. Khaliullin, O. Schütt and F. Schiffmann, *J. Chem. Phys.*, 2020, **152**, 194103.
4. G. Lippert, J. Hutter and M. Parrinello, *Theor. Chem. Acc.*, 1999, **103**, 124-140.
5. J. Paier, R. Hirschl, M. Marsman and G. Kresse, *J. Chem. Phys.*, 2005, **122**, 234102.
6. F. Aquilante, J. Autschbach, R. K. Carlson, L. F. Chibotaru, M. G. Delcey, L. De Vico, I. Fdez. Galván, N. Ferré, L. M. Frutos, L. Gagliardi, M. Garavelli, A. Giussani, C. E. Hoyer, G. Li Manni, H. Lischka, D. Ma, P. Å. Malmqvist, T. Müller, A. Nenov, M. Olivucci, T. B. Pedersen, D. Peng, F. Plasser, B. Pritchard, M. Reiher, I. Rivalta, I. Schapiro, J. Segarra-Martí, M. Stenrup, D. G. Truhlar, L. Ungur, A. Valentini, S. Vancoillie, V. Veryazov, V. P. Vysotskiy, O. Weingart, F. Zapata and R. Lindh, *J. Comput. Chem.*, 2016, **37**, 506-541.
7. T. H. Dunning and P. J. Hay, *Modern theoretical chemistry*, 1977, **3**, 1-28.
8. M. Frisch, G. Trucks, H. B. Schlegel, G. Scuseria, M. Robb, J. Cheeseman, G. Scalmani, V. Barone, B. Mennucci and G. Petersson, *Inc., Wallingford, CT*, 2009, **200**, 28.
9. J. Ogier, T. Arnould and E. Doris, *Future medicinal chemistry*, 2009, **1**, 693-711.
10. S. Sun, S. Wang, S. Li, Y. Li, Y. Zhang, J. Chen, Z. Zhang, S. Fang and P. Wang, *Journal of Materials Chemistry A*, 2016, **4**, 18646-18653.
11. J. Kong, H. T. Soh, A. M. Cassell, C. F. Quate and H. Dai, *Nature*, 1998, **395**, 878-881.
12. A. Khorsand, S. Jamehbozorgi, R. Ghiasi and M. Rezvani, *Physica E: Low-dimensional Systems and Nanostructures*, 2015, **72**, 120-127.
13. M. Rezvani, M. D. Ganji and M. Faghinasiri, *Physica E: Low-dimensional Systems and Nanostructures*, 2013, **52**, 27-33.
